# Supplementary material for: The role of Ni sites located in mesopores in the selectivity of anisole hydrodeoxygenation
Source: Royal Society of Chemistry journal article supplement (doi:10.1039/d1cy02132j), 2022-01-01
Supplement: d1cy02132j1.pdf [file d1cy02132j1.pdf]

## Supporting information

### The role of Ni sites located in mesopores for the selectivity of anisole hydrodeoxygenation

Penghui Yan<sup>1</sup>, Xinxin Tian<sup>2</sup>, Eric M. Kennedy<sup>1</sup>, Michael Stockenhuber<sup>1</sup>

<sup>1</sup> Chemical Engineering, School of Engineering, University of Newcastle, Callaghan, NSW, 2308, Australia

<sup>2</sup> Institute of Molecular Science, Key Laboratory of Materials for Energy Conversion and Storage of Shanxi Province, Shanxi University, Taiyuan 030006, P. R. China

\*Corresponding author: [michael.stockenhuber@newcastle.edu.au](mailto:michael.stockenhuber@newcastle.edu.au)

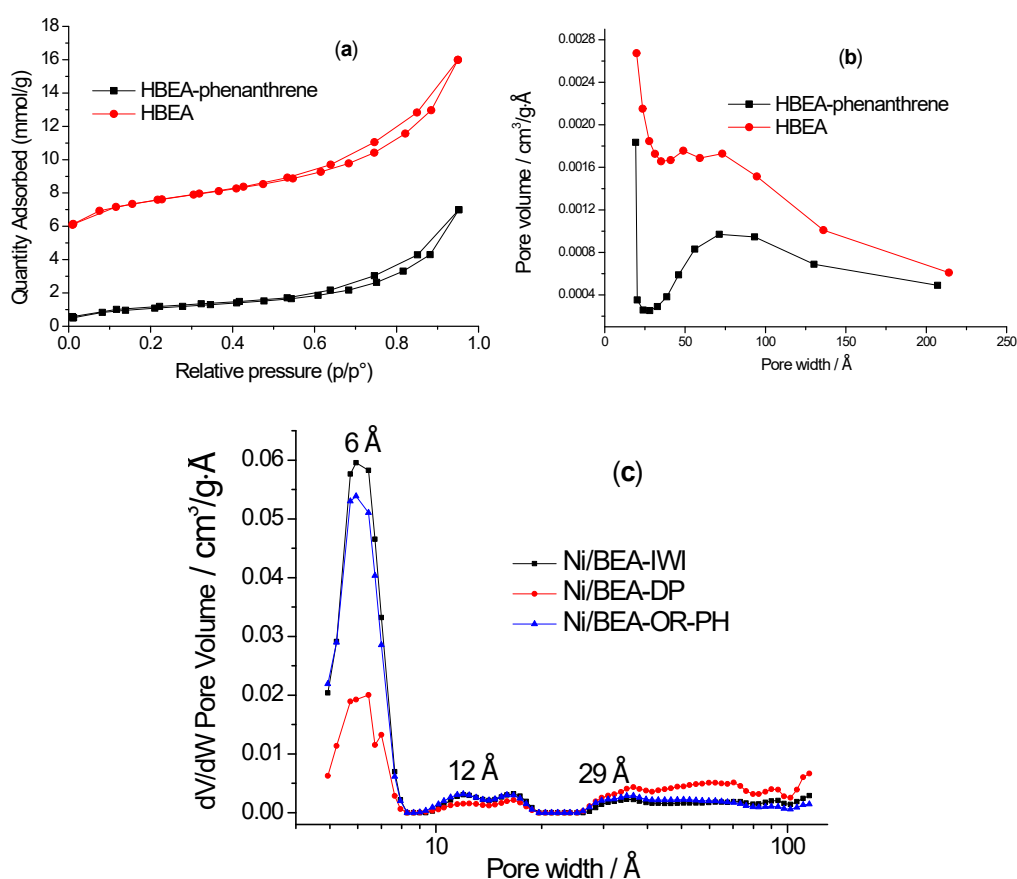

**Figure S1.** (a) N<sub>2</sub> adsorption-desorption isotherms and (b) pore size distribution of HBEA and HBEA following phenanthrene exposure; (c) Ar-NLDFT pore size distribution of Ni/BEA catalysts from the argon (-196 °C) isotherms.

**Table S1.** Acid concentration of support and catalysts

| Catalyst     | Acid concentration ((mmol/g <sub>cat</sub> )) |
|--------------|-----------------------------------------------|
| HBEA         | 0.84                                          |
| Ni/BEA-IWI   | 0.60                                          |
| Ni/BEA-OR-PH | 0.78                                          |
| Ni/BEA-DP    | 0.52                                          |

The acid concentrations of reduced catalysts in the range of 150~500 °C were determined by quantifying the desorbed NH<sub>3</sub> with NH<sub>3</sub>-TPD.

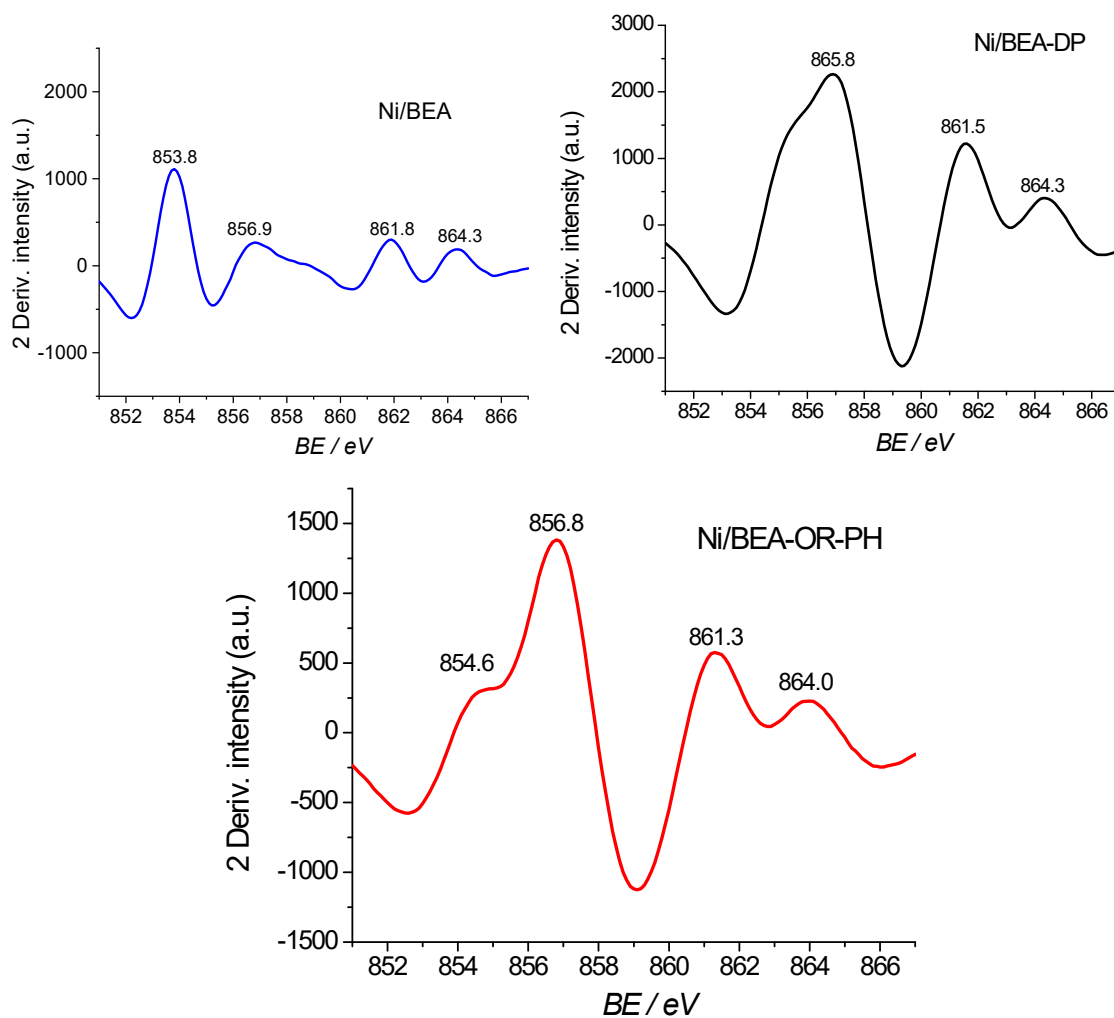

**Figure S2.** Second derivative XPS profiles of Ni/BEA catalysts

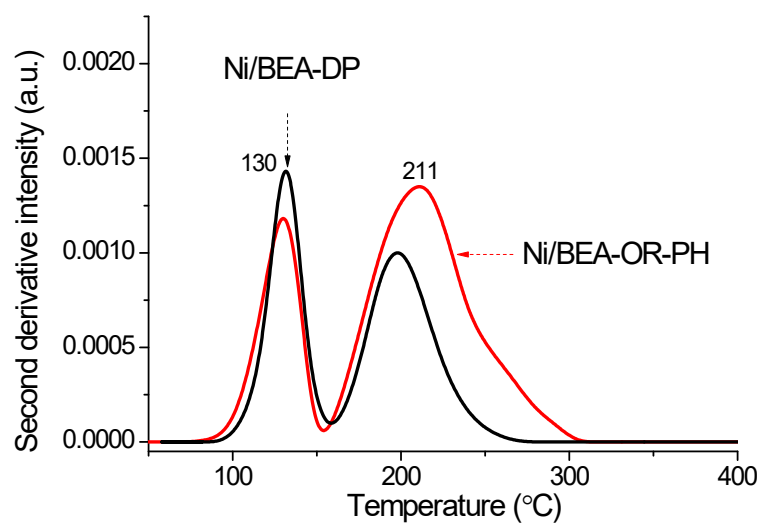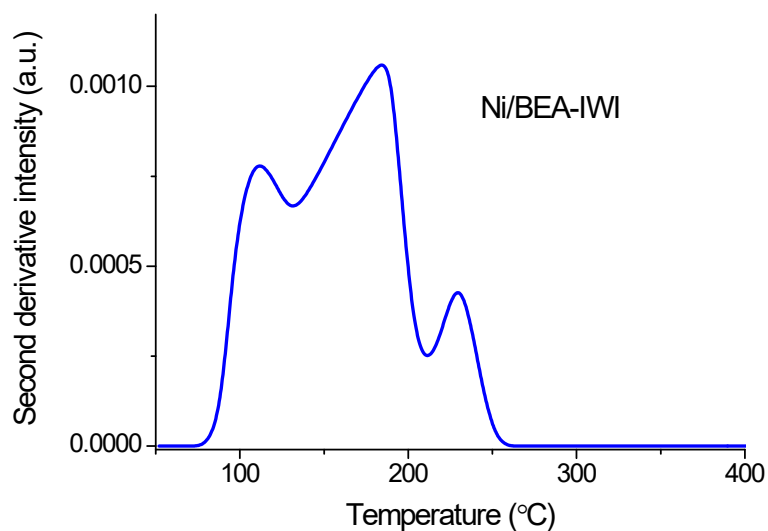

**Figure S3.** Second derivative H<sub>2</sub>-TPD profiles of pre-reduced Ni/BEA-DP, Ni/BEA-OR-PH and Ni/BEA-IWI catalysts

**Table S2.** Peak area of low-temperature and high-temperature desorbed H<sub>2</sub>

| Catalyst     | Low-temperature desorbed H <sub>2</sub> | high-temperature desorbed H <sub>2</sub> |
|--------------|-----------------------------------------|------------------------------------------|
| Ni/BEA-IWI   | 7.66                                    | 106.0                                    |
| Ni/BEA-OR-PH | 12.6                                    | 231.2                                    |
| Ni/BEA-DP    | 14.2                                    | 123.4                                    |

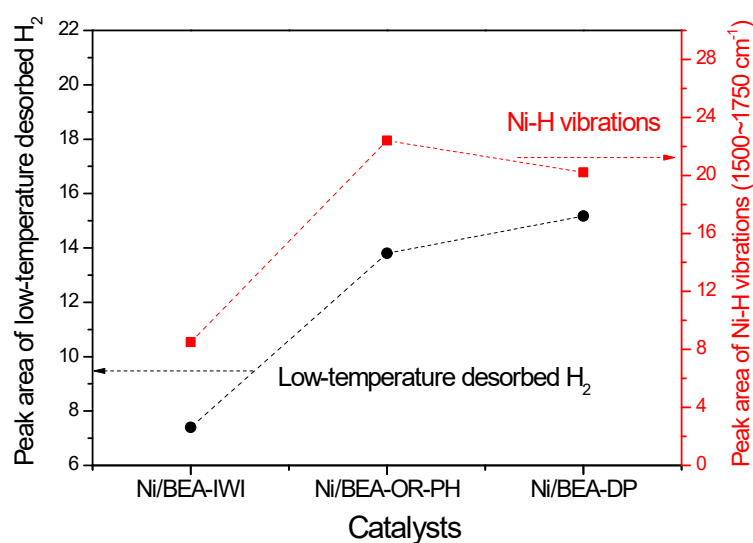

**Figure S4.** Relationship of low-temperature desorbed H<sub>2</sub> and Ni-H vibrations

**Table S3.** HDO of anisole over HBEA

| Time (min) | X <sub>-anisole</sub> (%) | Y <sub>-methylanisole</sub> (%) | Y <sub>-phenol</sub> (%) | Y <sub>-cresol</sub> (%) | Y <sub>-guaiacol</sub> (%) | Y <sub>-1,2-dimethoxybenzene</sub> (%) |
|------------|---------------------------|---------------------------------|--------------------------|--------------------------|----------------------------|----------------------------------------|
| 0~20       | 21.1                      | 8.6                             | 6.1                      | 2.6                      | 1.8                        | 1.3                                    |
| 20~40      | 16.8                      | 6.2                             | 4.8                      | 1.6                      | 3.2                        | 0.6                                    |
| 40~60      | 12.8                      | 5.1                             | 2.9                      | 0.5                      | 3.2                        | 0                                      |

[a] Reaction conditions: WHSV= 2.8 min<sup>-1</sup>, P(H<sub>2</sub>) = 4.0 MPa, H<sub>2</sub> flow rate=120 mL/min, T=230 °C.

**Table S4.** TPD of phenol and anisole

| Adsorption T (°C)  | Desorbed anisole (a.u.) | Desorbed phenol (a.u.) | T <sub>max-anisole</sub> <sup>a</sup> (K) | ΔE <sub>des-anisole</sub> <sup>b</sup> (kJ mol <sup>-1</sup> ) | T <sub>max-phenol</sub> <sup>a</sup> (K) | ΔE <sub>des-phenol</sub> <sup>b</sup> (kJ mol <sup>-1</sup> ) |
|--------------------|-------------------------|------------------------|-------------------------------------------|----------------------------------------------------------------|------------------------------------------|---------------------------------------------------------------|
| 150                | 2.23                    | 5.43                   | 615                                       | 155                                                            | 632                                      | 160                                                           |
| 230                | 0.75                    | 4.06                   | 619                                       | 156                                                            | 626                                      | 158                                                           |
| Peak area loss (%) | 66%                     | 25%                    | -                                         | -                                                              | -                                        | -                                                             |

<sup>a</sup> Temperature at peak maxima of desorption from TPD of anisole and phenol; <sup>b</sup> Heat of

desorption according to Redhead [1],  $\frac{\Delta E_{des}}{RT_{max}} = \ln \frac{v_1 T_{max}}{\beta} - 3.64$ ,  $v_1 = 10^{13} \text{ s}^{-1}$

## Reference

[1] Redhead, P. A. Thermal Desorption of Gases, *Vacuum*, **1962**,12, 203-211.
